# Supplementary material
Source: MDPI journal article supplement (https://www.mdpi.com/2073-4433/11/4/414)
Supplement: s1 [file s1]

## SUPPLEMENTARY MATERIALS

for the manuscript “Ultrafine particles features associated to pro-inflammatory and oxidative responses: implications for health studies” by F. Costabile, M. Gualtieri, C. Ancona, S. Canepari and S. Decesari

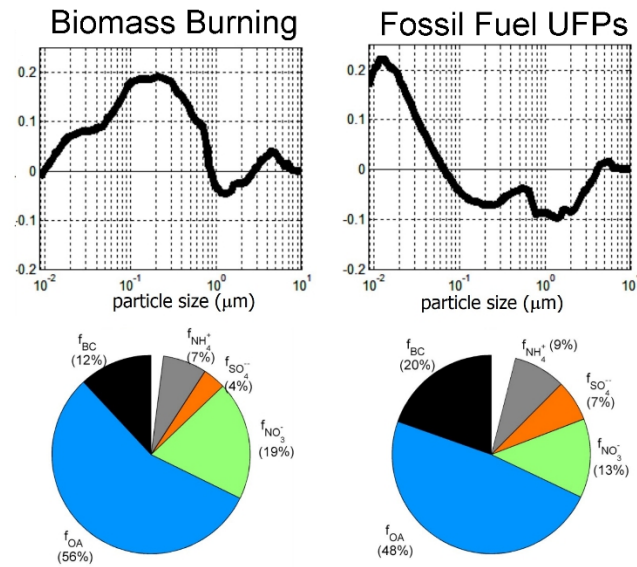

Figure S1. Particle number size distribution, and share of the major chemical components of the two combustion aerosols identified by a source apportionment analysis. Adapted from Costabile et al. (2019).
